# Supplementary material for: Sex Differences in Multimorbidity, Inappropriate Medication and Adverse Outcomes of Inpatient Care: MoPIM Cohort Study
Source: MDPI journal article supplement (doi:10.3390/ijerph20043639), 2023-02-18
Supplement: s1 [file s1]

**Table S1.** Prevalence of chronic conditions by sex for the total cohort. Fisher's exact test. CNS: central nervous system. COPD: chronic obstructive pulmonary disease.

| Variable                                    | Level | Female |       | Male |        | Total | P-value |
|---------------------------------------------|-------|--------|-------|------|--------|-------|---------|
|                                             |       | N      | %     | N    | %      | N     |         |
| Amputation                                  | No    | 390    | 98.98 | 334  | 96.53  | 724   | 0.039   |
|                                             | Yes   | 4      | 1.02  | 12   | 3.47   | 16    |         |
| Anemia                                      | No    | 212    | 53.81 | 194  | 56.07  | 406   | 0.554   |
|                                             | Yes   | 182    | 46.19 | 152  | 43.93  | 334   |         |
| Asthma                                      | No    | 320    | 81.22 | 338  | 97.69  | 658   | 0.000   |
|                                             | Yes   | 74     | 18.78 | 8    | 2.31   | 82    |         |
| Autoimmune and/or connective tissue disease | No    | 372    | 94.42 | 336  | 97.11  | 708   | 0.102   |
|                                             | Yes   | 22     | 5.58  | 10   | 2.89   | 32    |         |
| Cardiac arrhythmia                          | No    | 178    | 45.18 | 139  | 40.17  | 317   | 0.181   |
|                                             | Yes   | 216    | 54.82 | 207  | 59.83  | 423   |         |
| Cerebrovascular disease                     | No    | 299    | 75.89 | 253  | 73.12  | 552   | 0.398   |
|                                             | Yes   | 95     | 24.11 | 93   | 26.88  | 188   |         |
| Chronic renal insufficiency                 | No    | 230    | 58.38 | 190  | 54.91  | 420   | 0.372   |
|                                             | Yes   | 164    | 41.62 | 156  | 45.09  | 320   |         |
| CNS neurological disease                    | No    | 383    | 97.21 | 325  | 93.93  | 708   | 0.031   |
|                                             | Yes   | 11     | 2.79  | 21   | 6.07   | 32    |         |
| COPD                                        | No    | 304    | 77.16 | 163  | 47.11  | 467   | 0.000   |
|                                             | Yes   | 90     | 22.84 | 183  | 52.89  | 273   |         |
| Coronary ischemic disease                   | No    | 336    | 85.28 | 284  | 82.08  | 620   | 0.272   |
|                                             | Yes   | 58     | 14.72 | 62   | 17.92  | 120   |         |
| Degenerative arthropathy                    | No    | 166    | 42.13 | 189  | 54.62  | 355   | 0.001   |
|                                             | Yes   | 228    | 57.87 | 157  | 45.38  | 385   |         |
| Dementia                                    | No    | 291    | 73.86 | 270  | 78.03  | 561   | 0.197   |
|                                             | Yes   | 103    | 26.14 | 76   | 21.97  | 179   |         |
| Diabetes mellitus with organ damage         | No    | 324    | 82.23 | 283  | 81.79  | 607   | 0.924   |
|                                             | Yes   | 70     | 17.77 | 63   | 18.21  | 133   |         |
| Diabetes mellitus without organ damage      | No    | 293    | 74.37 | 246  | 71.10  | 539   | 0.322   |
|                                             | Yes   | 101    | 25.63 | 100  | 28.90  | 201   |         |
| Drug related conditions                     | No    | 350    | 88.83 | 323  | 93.35  | 673   | 0.039   |
|                                             | Yes   | 44     | 11.17 | 23   | 6.65   | 67    |         |
| Dyslipidemia                                | No    | 205    | 52.03 | 175  | 50.58  | 380   | 0.713   |
|                                             | Yes   | 189    | 47.97 | 171  | 49.42  | 360   |         |
| Fibromyalgia                                | No    | 388    | 98.48 | 344  | 99.42  | 732   | 0.295   |
|                                             | Yes   | 6      | 1.52  | 2    | 0.58   | 8     |         |
| Fracture (excluding hip)                    | No    | 307    | 77.92 | 294  | 84.97  | 601   | 0.014   |
|                                             | Yes   | 87     | 22.08 | 52   | 15.03  | 139   |         |
| Gallstones                                  | No    | 355    | 90.10 | 306  | 88.44  | 661   | 0.476   |
|                                             | Yes   | 39     | 9.90  | 40   | 11.56  | 79    |         |
| Gastroesophageal reflux disease             | No    | 340    | 86.29 | 306  | 88.44  | 646   | 0.439   |
|                                             | Yes   | 54     | 13.71 | 40   | 11.56  | 94    |         |
| Gout                                        | No    | 337    | 85.53 | 266  | 76.88  | 603   | 0.003   |
|                                             | Yes   | 57     | 14.47 | 80   | 23.12  | 137   |         |
| Heart failure                               | No    | 139    | 35.28 | 158  | 45.66  | 297   | 0.004   |
|                                             | Yes   | 255    | 64.72 | 188  | 54.34  | 443   |         |
| Hematological diseases                      | No    | 380    | 96.45 | 324  | 93.64  | 704   | 0.088   |
|                                             | Yes   | 14     | 3.55  | 22   | 6.36   | 36    |         |
| Hip fracture                                | No    | 342    | 86.80 | 331  | 95.66  | 673   | 0.000   |
|                                             | Yes   | 52     | 13.20 | 15   | 4.34   | 67    |         |
| Hypertension                                | No    | 64     | 16.24 | 73   | 21.10  | 137   | 0.107   |
|                                             | Yes   | 330    | 83.76 | 273  | 78.90  | 603   |         |
| Inflammatory osteoarticular disease         | No    | 368    | 93.40 | 323  | 93.35  | 691   | 1.000   |
|                                             | Yes   | 26     | 6.60  | 23   | 6.65   | 49    |         |
| Irritable bowel syndrome                    | No    | 387    | 98.22 | 342  | 98.84  | 729   | 0.555   |
|                                             | Yes   | 7      | 1.78  | 4    | 1.16   | 11    |         |
| Migraine                                    | No    | 390    | 98.98 | 346  | 100.00 | 736   | 0.127   |
|                                             | Yes   | 4      | 1.02  | 0    | 0.00   | 4     |         |
| Mild liver disease                          | No    | 382    | 96.95 | 326  | 94.22  | 708   | 0.073   |
|                                             | Yes   | 12     | 3.05  | 20   | 5.78   | 32    |         |
| Myocardial infarction                       | No    | 347    | 88.07 | 282  | 81.50  | 629   | 0.013   |
|                                             | Yes   | 47     | 11.93 | 64   | 18.50  | 111   |         |

|                                    |     |     |       |     |       |     |       |
|------------------------------------|-----|-----|-------|-----|-------|-----|-------|
| Neoplasia                          | No  | 365 | 92.64 | 264 | 76.30 | 629 | 0.000 |
|                                    | Yes | 29  | 7.36  | 82  | 23.70 | 111 |       |
| Non-ischemic heart disease         | No  | 269 | 68.27 | 233 | 67.34 | 502 | 0.813 |
|                                    | Yes | 125 | 31.73 | 113 | 32.66 | 238 |       |
| Non-schizophrenic mental disorders | No  | 383 | 97.21 | 345 | 99.71 | 728 | 0.007 |
|                                    | Yes | 11  | 2.79  | 1   | 0.29  | 12  |       |
| Obesity                            | No  | 267 | 67.77 | 280 | 80.92 | 547 | 0.000 |
|                                    | Yes | 127 | 32.23 | 66  | 19.08 | 193 |       |
| Osteoporosis                       | No  | 312 | 79.19 | 325 | 93.93 | 637 | 0.000 |
|                                    | Yes | 82  | 20.81 | 21  | 6.07  | 103 |       |
| Other neurological pathologies     | No  | 391 | 99.24 | 340 | 98.27 | 731 | 0.317 |
|                                    | Yes | 3   | 0.76  | 6   | 1.73  | 9   |       |
| Pancreas disease                   | No  | 390 | 98.98 | 340 | 98.27 | 730 | 0.528 |
|                                    | Yes | 4   | 1.02  | 6   | 1.73  | 10  |       |
| Parkinson's disease                | No  | 379 | 96.19 | 327 | 94.51 | 706 | 0.295 |
|                                    | Yes | 15  | 3.81  | 19  | 5.49  | 34  |       |
| Peripheral arteriopathy            | No  | 363 | 92.13 | 272 | 78.61 | 635 | 0.000 |
|                                    | Yes | 31  | 7.87  | 74  | 21.39 | 105 |       |
| Peripheral neuropathy              | No  | 367 | 93.15 | 312 | 90.17 | 679 | 0.180 |
|                                    | Yes | 27  | 6.85  | 34  | 9.83  | 61  |       |
| Post-traumatic stress disorder     | No  | 393 | 99.75 | 344 | 99.42 | 737 | 0.602 |
|                                    | Yes | 1   | 0.25  | 2   | 0.58  | 3   |       |
| Schizophrenia                      | No  | 393 | 99.75 | 344 | 99.42 | 737 | 0.602 |
|                                    | Yes | 1   | 0.25  | 2   | 0.58  | 3   |       |
| Severe liver disease               | No  | 385 | 97.72 | 336 | 97.11 | 721 | 0.647 |
|                                    | Yes | 9   | 2.28  | 10  | 2.89  | 19  |       |
| Sleep apnea                        | No  | 360 | 91.37 | 314 | 90.75 | 674 | 0.797 |
|                                    | Yes | 34  | 8.63  | 32  | 9.25  | 66  |       |
| Thyroid disease                    | No  | 301 | 76.40 | 304 | 87.86 | 605 | 0.000 |
|                                    | Yes | 93  | 23.60 | 42  | 12.14 | 135 |       |
| Tuberculosis                       | No  | 389 | 98.73 | 342 | 98.84 | 731 | 1.000 |
|                                    | Yes | 5   | 1.27  | 4   | 1.16  | 9   |       |
| Ulcerative disease                 | No  | 383 | 97.21 | 311 | 89.88 | 694 | 0.000 |
|                                    | Yes | 11  | 2.79  | 35  | 10.12 | 46  |       |
| Urinary tract stones               | No  | 385 | 97.72 | 341 | 98.55 | 726 | 0.433 |
|                                    | Yes | 9   | 2.28  | 5   | 1.45  | 14  |       |
| Varicose veins                     | No  | 296 | 75.13 | 280 | 80.92 | 576 | 0.063 |
|                                    | Yes | 98  | 24.87 | 66  | 19.08 | 164 |       |
| Vertigo                            | No  | 340 | 86.29 | 323 | 93.35 | 663 | 0.002 |
|                                    | Yes | 54  | 13.71 | 23  | 6.65  | 77  |       |

**Table S2.** Prevalence of chronic conditions stratified by age group 65-84 years. Fisher's exact test. CNS: central nervous system. COPD: chronic obstructive pulmonary disease.

| Variable                                    | Level | Female<br>N | %     | Male<br>N | %      | Total<br>N | P-value |
|---------------------------------------------|-------|-------------|-------|-----------|--------|------------|---------|
| Amputation                                  | No    | 154         | 98.09 | 178       | 95.19  | 332        | 0.237   |
|                                             | Yes   | 3           | 1.91  | 9         | 4.81   | 12         |         |
| Anemia                                      | No    | 74          | 47.13 | 97        | 51.87  | 171        | 0.389   |
|                                             | Yes   | 83          | 52.87 | 90        | 48.13  | 173        |         |
| Asthma                                      | No    | 123         | 78.34 | 182       | 97.33  | 305        | 0.000   |
|                                             | Yes   | 34          | 21.66 | 5         | 2.67   | 39         |         |
| Autoimmune and/or connective tissue disease | No    | 148         | 94.27 | 179       | 95.72  | 327        | 0.621   |
|                                             | Yes   | 9           | 5.73  | 8         | 4.28   | 17         |         |
| Cardiac arrhythmia                          | No    | 72          | 45.86 | 83        | 44.39  | 155        | 0.828   |
|                                             | Yes   | 85          | 54.14 | 104       | 55.61  | 189        |         |
| Cerebrovascular disease                     | No    | 123         | 78.34 | 136       | 72.73  | 259        | 0.259   |
|                                             | Yes   | 34          | 21.66 | 51        | 27.27  | 85         |         |
| Chronic renal insufficiency                 | No    | 92          | 58.60 | 105       | 56.15  | 197        | 0.663   |
|                                             | Yes   | 65          | 41.40 | 82        | 43.85  | 147        |         |
| CNS neurological disease                    | No    | 150         | 95.54 | 176       | 94.12  | 326        | 0.632   |
|                                             | Yes   | 7           | 4.46  | 11        | 5.88   | 18         |         |
| COPD                                        | No    | 126         | 80.25 | 93        | 49.73  | 219        | 0.000   |
|                                             | Yes   | 31          | 19.75 | 94        | 50.27  | 125        |         |
| Coronary ischemic disease                   | No    | 132         | 84.08 | 156       | 83.42  | 288        | 0.885   |
|                                             | Yes   | 25          | 15.92 | 31        | 16.58  | 56         |         |
| Degenerative arthropathy                    | No    | 59          | 37.58 | 104       | 55.61  | 163        | 0.001   |
|                                             | Yes   | 98          | 62.42 | 83        | 44.39  | 181        |         |
| Dementia                                    | No    | 122         | 77.71 | 151       | 80.75  | 273        | 0.506   |
|                                             | Yes   | 35          | 22.29 | 36        | 19.25  | 71         |         |
| Diabetes mellitus with organ damage         | No    | 120         | 76.43 | 148       | 79.14  | 268        | 0.602   |
|                                             | Yes   | 37          | 23.57 | 39        | 20.86  | 76         |         |
| Diabetes mellitus without organ damage      | No    | 110         | 70.06 | 128       | 68.45  | 238        | 0.815   |
|                                             | Yes   | 47          | 29.94 | 59        | 31.55  | 106        |         |
| Drug related conditions                     | No    | 131         | 83.44 | 172       | 91.98  | 303        | 0.019   |
|                                             | Yes   | 26          | 16.56 | 15        | 8.02   | 41         |         |
| Dyslipidemia                                | No    | 75          | 47.77 | 79        | 42.25  | 154        | 0.328   |
|                                             | Yes   | 82          | 52.23 | 108       | 57.75  | 190        |         |
| Fibromyalgia                                | No    | 153         | 97.45 | 185       | 98.93  | 338        | 0.418   |
|                                             | Yes   | 4           | 2.55  | 2         | 1.07   | 6          |         |
| Fracture (excluding hip)                    | No    | 120         | 76.43 | 152       | 81.28  | 272        | 0.289   |
|                                             | Yes   | 37          | 23.57 | 35        | 18.72  | 72         |         |
| Gallstones                                  | No    | 141         | 89.81 | 165       | 88.24  | 306        | 0.731   |
|                                             | Yes   | 16          | 10.19 | 22        | 11.76  | 38         |         |
| Gastroesophageal reflux disease             | No    | 135         | 85.99 | 168       | 89.84  | 303        | 0.317   |
|                                             | Yes   | 22          | 14.01 | 19        | 10.16  | 41         |         |
| Gout                                        | No    | 131         | 83.44 | 147       | 78.61  | 278        | 0.274   |
|                                             | Yes   | 26          | 16.56 | 40        | 21.39  | 66         |         |
| Heart failure                               | No    | 54          | 34.39 | 90        | 48.13  | 144        | 0.012   |
|                                             | Yes   | 103         | 65.61 | 97        | 51.87  | 200        |         |
| Hematological diseases                      | No    | 151         | 96.18 | 173       | 92.51  | 324        | 0.171   |
|                                             | Yes   | 6           | 3.82  | 14        | 7.49   | 20         |         |
| Hip fracture                                | No    | 144         | 91.72 | 179       | 95.72  | 323        | 0.174   |
|                                             | Yes   | 13          | 8.28  | 8         | 4.28   | 21         |         |
| Hypertension                                | No    | 25          | 15.92 | 38        | 20.32  | 63         | 0.329   |
|                                             | Yes   | 132         | 84.08 | 149       | 79.68  | 281        |         |
| Inflammatory osteoarticular disease         | No    | 145         | 92.36 | 170       | 90.91  | 315        | 0.699   |
|                                             | Yes   | 12          | 7.64  | 17        | 9.09   | 29         |         |
| Irritable bowel syndrome                    | No    | 153         | 97.45 | 186       | 99.47  | 339        | 0.182   |
|                                             | Yes   | 4           | 2.55  | 1         | 0.53   | 5          |         |
| Migraine                                    | No    | 153         | 97.45 | 187       | 100.00 | 340        | 0.042   |
|                                             | Yes   | 4           | 2.55  | 0         | 0.00   | 4          |         |
| Mild liver disease                          | No    | 146         | 92.99 | 176       | 94.12  | 322        | 0.826   |
|                                             | Yes   | 11          | 7.01  | 11        | 5.88   | 22         |         |
| Myocardial infarction                       | No    | 136         | 86.62 | 150       | 80.21  | 286        | 0.148   |
|                                             | Yes   | 21          | 13.38 | 37        | 19.79  | 58         |         |
| Neoplasia                                   | No    | 144         | 91.72 | 138       | 73.80  | 282        | 0.000   |

|                                    |     |     |        |     |       |     |       |
|------------------------------------|-----|-----|--------|-----|-------|-----|-------|
|                                    | Yes | 13  | 8.28   | 49  | 26.20 | 62  |       |
| Non-ischemic heart disease         | No  | 107 | 68.15  | 118 | 63.10 | 225 | 0.363 |
|                                    | Yes | 50  | 31.85  | 69  | 36.90 | 119 |       |
| Non-schizophrenic mental disorders | No  | 151 | 96.18  | 186 | 99.47 | 337 | 0.050 |
|                                    | Yes | 6   | 3.82   | 1   | 0.53  | 7   |       |
| Obesity                            | No  | 91  | 57.96  | 146 | 78.07 | 237 | 0.000 |
|                                    | Yes | 66  | 42.04  | 41  | 21.93 | 107 |       |
| Osteoporosis                       | No  | 124 | 78.98  | 170 | 90.91 | 294 | 0.002 |
|                                    | Yes | 33  | 21.02  | 17  | 9.09  | 50  |       |
| Other neurological pathologies     | No  | 156 | 99.36  | 184 | 98.40 | 340 | 0.629 |
|                                    | Yes | 1   | 0.64   | 3   | 1.60  | 4   |       |
| Pancreas disease                   | No  | 157 | 100.00 | 183 | 97.86 | 340 | 0.129 |
|                                    | Yes | 0   | 0.00   | 4   | 2.14  | 4   |       |
| Parkinson's disease                | No  | 151 | 96.18  | 175 | 93.58 | 326 | 0.337 |
|                                    | Yes | 6   | 3.82   | 12  | 6.42  | 18  |       |
| Peripheral arteriopathy            | No  | 142 | 90.45  | 142 | 75.94 | 284 | 0.001 |
|                                    | Yes | 15  | 9.55   | 45  | 24.06 | 60  |       |
| Peripheral neuropathy              | No  | 137 | 87.26  | 164 | 87.70 | 301 | 1.000 |
|                                    | Yes | 20  | 12.74  | 23  | 12.30 | 43  |       |
| Post-traumatic stress disorder     | No  | 156 | 99.36  | 186 | 99.47 | 342 | 1.000 |
|                                    | Yes | 1   | 0.64   | 1   | 0.53  | 2   |       |
| Schizophrenia                      | No  | 156 | 99.36  | 185 | 98.93 | 341 | 1.000 |
|                                    | Yes | 1   | 0.64   | 2   | 1.07  | 3   |       |
| Severe liver disease               | No  | 150 | 95.54  | 177 | 94.65 | 327 | 0.805 |
|                                    | Yes | 7   | 4.46   | 10  | 5.35  | 17  |       |
| Sleep apnea                        | No  | 133 | 84.71  | 160 | 85.56 | 293 | 0.879 |
|                                    | Yes | 24  | 15.29  | 27  | 14.44 | 51  |       |
| Thyroid disease                    | No  | 112 | 71.34  | 163 | 87.17 | 275 | 0.000 |
|                                    | Yes | 45  | 28.66  | 24  | 12.83 | 69  |       |
| Tuberculosis                       | No  | 155 | 98.73  | 186 | 99.47 | 341 | 0.594 |
|                                    | Yes | 2   | 1.27   | 1   | 0.53  | 3   |       |
| Ulcerative disease                 | No  | 152 | 96.82  | 169 | 90.37 | 321 | 0.018 |
|                                    | Yes | 5   | 3.18   | 18  | 9.63  | 23  |       |
| Urinary tract stones               | No  | 153 | 97.45  | 182 | 97.33 | 335 | 1.000 |
|                                    | Yes | 4   | 2.55   | 5   | 2.67  | 9   |       |
| Varicose veins                     | No  | 102 | 64.97  | 146 | 78.07 | 248 | 0.008 |
|                                    | Yes | 55  | 35.03  | 41  | 21.93 | 96  |       |
| Vertigo                            | No  | 132 | 84.08  | 174 | 93.05 | 306 | 0.010 |
|                                    | Yes | 25  | 15.92  | 13  | 6.95  | 38  |       |

**Table S3.** Prevalence of chronic conditions by sex stratified by age group  $\geq 85$  years. Fisher's exact test. CNS: central nervous system. COPD: chronic obstructive pulmonary disease.

| Variable                                    | Level | Female<br>N | %     | Male<br>N | %      | Total<br>N | P-value |
|---------------------------------------------|-------|-------------|-------|-----------|--------|------------|---------|
| Amputation                                  | No    | 236         | 99.58 | 156       | 98.11  | 392        | 0.307   |
|                                             | Yes   | 1           | 0.42  | 3         | 1.89   | 4          |         |
| Anemia                                      | No    | 138         | 58.23 | 97        | 61.01  | 235        | 0.603   |
|                                             | Yes   | 99          | 41.77 | 62        | 38.99  | 161        |         |
| Asthma                                      | No    | 197         | 83.12 | 156       | 98.11  | 353        | 0.000   |
|                                             | Yes   | 40          | 16.88 | 3         | 1.89   | 43         |         |
| Autoimmune and/or connective tissue disease | No    | 224         | 94.51 | 157       | 98.74  | 381        | 0.033   |
|                                             | Yes   | 13          | 5.49  | 2         | 1.26   | 15         |         |
| Cardiac arrhythmia                          | No    | 106         | 44.73 | 56        | 35.22  | 162        | 0.062   |
|                                             | Yes   | 131         | 55.27 | 103       | 64.78  | 234        |         |
| Cerebrovascular disease                     | No    | 176         | 74.26 | 117       | 73.58  | 293        | 0.907   |
|                                             | Yes   | 61          | 25.74 | 42        | 26.42  | 103        |         |
| Chronic renal insufficiency                 | No    | 138         | 58.23 | 85        | 53.46  | 223        | 0.354   |
|                                             | Yes   | 99          | 41.77 | 74        | 46.54  | 173        |         |
| CNS neurological disease                    | No    | 233         | 98.31 | 149       | 93.71  | 382        | 0.023   |
|                                             | Yes   | 4           | 1.69  | 10        | 6.29   | 14         |         |
| COPD                                        | No    | 178         | 75.11 | 70        | 44.03  | 248        | 0.000   |
|                                             | Yes   | 59          | 24.89 | 89        | 55.97  | 148        |         |
| Coronary ischemic disease                   | No    | 204         | 86.08 | 128       | 80.50  | 332        | 0.164   |
|                                             | Yes   | 33          | 13.92 | 31        | 19.50  | 64         |         |
| Degenerative arthropathy                    | No    | 107         | 45.15 | 85        | 53.46  | 192        | 0.124   |
|                                             | Yes   | 130         | 54.85 | 74        | 46.54  | 204        |         |
| Dementia                                    | No    | 169         | 71.31 | 119       | 74.84  | 288        | 0.490   |
|                                             | Yes   | 68          | 28.69 | 40        | 25.16  | 108        |         |
| Diabetes mellitus with organ damage         | No    | 204         | 86.08 | 135       | 84.91  | 339        | 0.771   |
|                                             | Yes   | 33          | 13.92 | 24        | 15.09  | 57         |         |
| Diabetes mellitus without organ damage      | No    | 183         | 77.22 | 118       | 74.21  | 301        | 0.549   |
|                                             | Yes   | 54          | 22.78 | 41        | 25.79  | 95         |         |
| Drug related conditions                     | No    | 219         | 92.41 | 151       | 94.97  | 370        | 0.409   |
|                                             | Yes   | 18          | 7.59  | 8         | 5.03   | 26         |         |
| Dyslipidemia                                | No    | 130         | 54.85 | 96        | 60.38  | 226        | 0.301   |
|                                             | Yes   | 107         | 45.15 | 63        | 39.62  | 170        |         |
| Fibromyalgia                                | No    | 235         | 99.16 | 159       | 100.00 | 394        | 0.518   |
|                                             | Yes   | 2           | 0.84  | 0         | 0.00   | 2          |         |
| Fracture (excluding hip)                    | No    | 187         | 78.90 | 142       | 89.31  | 329        | 0.006   |
|                                             | Yes   | 50          | 21.10 | 17        | 10.69  | 67         |         |
| Gallstones                                  | No    | 214         | 90.30 | 141       | 88.68  | 355        | 0.617   |
|                                             | Yes   | 23          | 9.70  | 18        | 11.32  | 41         |         |
| Gastroesophageal reflux disease             | No    | 205         | 86.50 | 138       | 86.79  | 343        | 1.000   |
|                                             | Yes   | 32          | 13.50 | 21        | 13.21  | 53         |         |
| Gout                                        | No    | 206         | 86.92 | 119       | 74.84  | 325        | 0.003   |
|                                             | Yes   | 31          | 13.08 | 40        | 25.16  | 71         |         |
| Heart failure                               | No    | 85          | 35.86 | 68        | 42.77  | 153        | 0.173   |
|                                             | Yes   | 152         | 64.14 | 91        | 57.23  | 243        |         |
| Hematological diseases                      | No    | 229         | 96.62 | 151       | 94.97  | 380        | 0.443   |
|                                             | Yes   | 8           | 3.38  | 8         | 5.03   | 16         |         |
| Hip fracture                                | No    | 198         | 83.54 | 152       | 95.60  | 350        | 0.000   |
|                                             | Yes   | 39          | 16.46 | 7         | 4.40   | 46         |         |
| Hypertension                                | No    | 39          | 16.46 | 35        | 22.01  | 74         | 0.189   |
|                                             | Yes   | 198         | 83.54 | 124       | 77.99  | 322        |         |
| Inflammatory osteoarticular disease         | No    | 223         | 94.09 | 153       | 96.23  | 376        | 0.483   |
|                                             | Yes   | 14          | 5.91  | 6         | 3.77   | 20         |         |
| Irritable bowel syndrome                    | No    | 234         | 98.73 | 156       | 98.11  | 390        | 0.688   |
|                                             | Yes   | 3           | 1.27  | 3         | 1.89   | 6          |         |
| Mild liver disease                          | No    | 236         | 99.58 | 150       | 94.34  | 386        | 0.002   |
|                                             | Yes   | 1           | 0.42  | 9         | 5.66   | 10         |         |
| Myocardial infarction                       | No    | 211         | 89.03 | 132       | 83.02  | 343        | 0.098   |
|                                             | Yes   | 26          | 10.97 | 27        | 16.98  | 53         |         |
| Neoplasia                                   | No    | 221         | 93.25 | 126       | 79.25  | 347        | 0.000   |
|                                             | Yes   | 16          | 6.75  | 33        | 20.75  | 49         |         |
| Non-ischemic heart disease                  | No    | 162         | 68.35 | 115       | 72.33  | 277        | 0.435   |

|                                    |     |     |        |     |        |     |       |
|------------------------------------|-----|-----|--------|-----|--------|-----|-------|
| Non-schizophrenic mental disorders | Yes | 75  | 31.65  | 44  | 27.67  | 119 | 0.086 |
|                                    | No  | 232 | 97.89  | 159 | 100.00 | 391 |       |
| Obesity                            | Yes | 5   | 2.11   | 0   | 0.00   | 5   | 0.018 |
|                                    | No  | 176 | 74.26  | 134 | 84.28  | 310 |       |
| Osteoporosis                       | Yes | 61  | 25.74  | 25  | 15.72  | 86  | 0.000 |
|                                    | No  | 188 | 79.32  | 155 | 97.48  | 343 |       |
| Other neurological pathologies     | Yes | 49  | 20.68  | 4   | 2.52   | 53  | 0.395 |
|                                    | No  | 235 | 99.16  | 156 | 98.11  | 391 |       |
| Pancreas disease                   | Yes | 2   | 0.84   | 3   | 1.89   | 5   | 1.000 |
|                                    | No  | 233 | 98.31  | 157 | 98.74  | 390 |       |
| Parkinson's disease                | Yes | 4   | 1.69   | 2   | 1.26   | 6   | 0.798 |
|                                    | No  | 228 | 96.20  | 152 | 95.60  | 380 |       |
| Peripheral arteriopathy            | Yes | 9   | 3.80   | 7   | 4.40   | 16  | 0.001 |
|                                    | No  | 221 | 93.25  | 130 | 81.76  | 351 |       |
| Peripheral neuropathy              | Yes | 16  | 6.75   | 29  | 18.24  | 45  | 0.084 |
|                                    | No  | 230 | 97.05  | 148 | 93.08  | 378 |       |
| Post-traumatic stress disorder     | Yes | 7   | 2.95   | 11  | 6.92   | 18  | 0.402 |
|                                    | No  | 237 | 100.00 | 158 | 99.37  | 395 |       |
| Severe liver disease               | Yes | 0   | 0.00   | 1   | 0.63   | 1   | 0.518 |
|                                    | No  | 235 | 99.16  | 159 | 100.00 | 394 |       |
| Sleep apnea                        | Yes | 2   | 0.84   | 0   | 0.00   | 2   | 0.789 |
|                                    | No  | 227 | 95.78  | 154 | 96.86  | 381 |       |
| Thyroid disease                    | Yes | 10  | 4.22   | 5   | 3.14   | 15  | 0.020 |
|                                    | No  | 189 | 79.75  | 141 | 88.68  | 330 |       |
| Tuberculosis                       | Yes | 48  | 20.25  | 18  | 11.32  | 66  | 0.688 |
|                                    | No  | 234 | 98.73  | 156 | 98.11  | 390 |       |
| Ulcerative disease                 | Yes | 3   | 1.27   | 3   | 1.89   | 6   | 0.001 |
|                                    | No  | 231 | 97.47  | 142 | 89.31  | 373 |       |
| Urinary tract stones               | Yes | 6   | 2.53   | 17  | 10.69  | 23  | 0.086 |
|                                    | No  | 232 | 97.89  | 159 | 100.00 | 391 |       |
| Varicose veins                     | Yes | 5   | 2.11   | 0   | 0.00   | 5   | 0.588 |
|                                    | No  | 194 | 81.86  | 134 | 84.28  | 328 |       |
| Vertigo                            | Yes | 43  | 18.14  | 25  | 15.72  | 68  | 0.059 |
|                                    | No  | 208 | 87.76  | 149 | 93.71  | 357 |       |
|                                    | Yes | 29  | 12.24  | 10  | 6.29   | 39  |       |

**Table S4.** Prevalence of geriatric syndromes by sex for the total cohort. Fisher's exact test.

| Variable                          | Level | Female |       | Male |       | Total | P-value |
|-----------------------------------|-------|--------|-------|------|-------|-------|---------|
|                                   |       | N      | %     | N    | %     | N     |         |
| Acute confusional syndrome        | No    | 276    | 70.05 | 229  | 66.18 | 505   | 0.269   |
|                                   | Yes   | 118    | 29.95 | 117  | 33.82 | 235   |         |
| Chronic pain                      | No    | 163    | 41.37 | 175  | 50.58 | 338   | 0.015   |
|                                   | Yes   | 231    | 58.63 | 171  | 49.42 | 402   |         |
| Cognitive/Intellectual impairment | No    | 261    | 66.24 | 250  | 72.25 | 511   | 0.080   |
|                                   | Yes   | 133    | 33.76 | 96   | 27.75 | 229   |         |
| Constipation                      | No    | 193    | 48.98 | 207  | 59.83 | 400   | 0.004   |
|                                   | Yes   | 201    | 51.02 | 139  | 40.17 | 340   |         |
| Depression & Anxiety              | No    | 201    | 51.02 | 271  | 78.32 | 472   | 0.000   |
|                                   | Yes   | 193    | 48.98 | 75   | 21.68 | 268   |         |
| Dysphagia                         | No    | 316    | 80.20 | 265  | 76.59 | 581   | 0.244   |
|                                   | Yes   | 78     | 19.80 | 81   | 23.41 | 159   |         |
| Polypharmacy                      | No    | 84     | 21.32 | 65   | 18.79 | 149   | 0.409   |
|                                   | Yes   | 310    | 78.68 | 281  | 81.21 | 591   |         |
| Immobility                        | No    | 280    | 71.07 | 268  | 77.46 | 548   | 0.053   |
|                                   | Yes   | 114    | 28.93 | 78   | 22.54 | 192   |         |
| Instability/falls                 | No    | 236    | 59.90 | 218  | 63.01 | 454   | 0.406   |
|                                   | Yes   | 158    | 40.10 | 128  | 36.99 | 286   |         |
| Malnutrition                      | No    | 318    | 80.71 | 275  | 79.48 | 593   | 0.712   |
|                                   | Yes   | 76     | 19.29 | 71   | 20.52 | 147   |         |
| Pressure ulcers                   | No    | 337    | 85.53 | 308  | 89.02 | 645   | 0.186   |
|                                   | Yes   | 57     | 14.47 | 38   | 10.98 | 95    |         |
| Sensory deficit                   | No    | 225    | 57.11 | 201  | 58.09 | 426   | 0.823   |
|                                   | Yes   | 169    | 42.89 | 145  | 41.91 | 314   |         |
| Sleep disorders/Insomnia          | No    | 205    | 52.03 | 202  | 58.38 | 407   | 0.089   |
|                                   | Yes   | 189    | 47.97 | 144  | 41.62 | 333   |         |
| (Urinary/faecal) Incontinence     | No    | 121    | 30.71 | 189  | 54.62 | 310   | 0.000   |
|                                   | Yes   | 273    | 69.29 | 157  | 45.38 | 430   |         |

**Table S5.** Potentially inappropriate medication according to STOPP criteria by sex. Fisher's Exact Test.

| Variable                                                                                                                                                                                                                                   | Level | Female<br>N | %     | Male<br>N | %      | Total<br>N | P-value |
|--------------------------------------------------------------------------------------------------------------------------------------------------------------------------------------------------------------------------------------------|-------|-------------|-------|-----------|--------|------------|---------|
| A1: Acid reducer prescribed without an evidence-based clinical indication                                                                                                                                                                  | No    | 312         | 79.19 | 268       | 77.46  | 580        | 0.592   |
|                                                                                                                                                                                                                                            | Yes   | 82          | 20.81 | 78        | 22.54  | 160        |         |
| A1: Hypolipidemic drug prescribed without an evidence-based clinical indication                                                                                                                                                            | No    | 379         | 96.19 | 332       | 95.95  | 711        | 1.000   |
|                                                                                                                                                                                                                                            | Yes   | 15          | 3.81  | 14        | 4.05   | 29         |         |
| A1: Analgesic drug prescribed without an evidence-based clinical indication                                                                                                                                                                | No    | 379         | 96.19 | 340       | 98.27  | 719        | 0.120   |
|                                                                                                                                                                                                                                            | Yes   | 15          | 3.81  | 6         | 1.73   | 21         |         |
| A1: Aspirin prescribed without an evidence-based clinical indication                                                                                                                                                                       | No    | 382         | 96.95 | 342       | 98.84  | 724        | 0.126   |
|                                                                                                                                                                                                                                            | Yes   | 12          | 3.05  | 4         | 1.16   | 16         |         |
| A1: Antihypertensive drug prescribed without an evidence-based clinical indication                                                                                                                                                         | No    | 388         | 98.48 | 342       | 98.84  | 730        | 0.757   |
|                                                                                                                                                                                                                                            | Yes   | 6           | 1.52  | 4         | 1.16   | 10         |         |
| A1: Other drug prescribed without an evidence-based clinical indication                                                                                                                                                                    | No    | 357         | 90.61 | 320       | 92.49  | 677        | 0.429   |
|                                                                                                                                                                                                                                            | Yes   | 37          | 9.39  | 26        | 7.51   | 63         |         |
| A2: Any drug prescribed beyond the recommended duration, where treatment duration is well defined                                                                                                                                          | No    | 377         | 95.69 | 328       | 94.80  | 705        | 0.606   |
|                                                                                                                                                                                                                                            | Yes   | 17          | 4.31  | 18        | 5.20   | 35         |         |
| A3: Any duplicate drug class prescription                                                                                                                                                                                                  | No    | 378         | 95.94 | 333       | 96.24  | 711        | 0.852   |
|                                                                                                                                                                                                                                            | Yes   | 16          | 4.06  | 13        | 3.76   | 29         |         |
| B1: Digoxin for heart failure with normal systolic ventricular function                                                                                                                                                                    | No    | 393         | 99.75 | 342       | 98.84  | 735        | 0.191   |
|                                                                                                                                                                                                                                            | Yes   | 1           | 0.25  | 4         | 1.16   | 5          |         |
| B2: Verapamil or diltiazem with NYHA Class III or IV heart failure                                                                                                                                                                         | No    | 390         | 98.98 | 345       | 99.71  | 735        | 0.379   |
|                                                                                                                                                                                                                                            | Yes   | 4           | 1.02  | 1         | 0.29   | 5          |         |
| B3: Beta-blocker in combination with verapamil or diltiazem                                                                                                                                                                                | No    | 393         | 99.75 | 346       | 100.00 | 739        | 1.000   |
|                                                                                                                                                                                                                                            | Yes   | 1           | 0.25  | 0         | 0.00   | 1          |         |
| B4: Beta blocker with bradycardia, type II heart block or complete heart block                                                                                                                                                             | No    | 393         | 99.75 | 344       | 99.42  | 737        | 0.602   |
|                                                                                                                                                                                                                                            | Yes   | 1           | 0.25  | 2         | 0.58   | 3          |         |
| B5: Amiodarone as first-line antiarrhythmic therapy in supraventricular tachyarrhythmia                                                                                                                                                    | No    | 388         | 98.48 | 339       | 97.98  | 727        | 0.781   |
|                                                                                                                                                                                                                                            | Yes   | 6           | 1.52  | 7         | 2.02   | 13         |         |
| B6: Loop diuretic as first-line treatment for hypertension                                                                                                                                                                                 | No    | 388         | 98.48 | 339       | 97.98  | 727        | 0.781   |
|                                                                                                                                                                                                                                            | Yes   | 6           | 1.52  | 7         | 2.02   | 13         |         |
| B7: Loop diuretic for dependent ankle oedema without clinical, biochemical evidence or radiological evidence of heart failure, liver failure, nephrotic syndrome or renal failure                                                          | No    | 390         | 98.98 | 342       | 98.84  | 732        | 1.000   |
|                                                                                                                                                                                                                                            | Yes   | 4           | 1.02  | 4         | 1.16   | 8          |         |
| B8: Thiazide diuretic with current significant hypokalaemia, hyponatraemia, hypercalcaemia or with a history of gout                                                                                                                       | No    | 382         | 96.95 | 340       | 98.27  | 722        | 0.340   |
|                                                                                                                                                                                                                                            | Yes   | 12          | 3.05  | 6         | 1.73   | 18         |         |
| B9: Loop diuretic for treatment of hypertension with concurrent urinary incontinence                                                                                                                                                       | No    | 391         | 99.24 | 344       | 99.42  | 735        | 1.000   |
|                                                                                                                                                                                                                                            | Yes   | 3           | 0.76  | 2         | 0.58   | 5          |         |
| B11: ACE inhibitors or Angiotensin Receptor Blockers in patients with hyperkalaemia                                                                                                                                                        | No    | 372         | 94.42 | 324       | 93.64  | 696        | 0.756   |
|                                                                                                                                                                                                                                            | Yes   | 22          | 5.58  | 22        | 6.36   | 44         |         |
| B12: Aldosterone antagonists with concurrent potassium-conserving drugs without monitoring of serum potassium                                                                                                                              | No    | 386         | 97.97 | 337       | 97.40  | 723        | 0.631   |
|                                                                                                                                                                                                                                            | Yes   | 8           | 2.03  | 9         | 2.60   | 17         |         |
| C1: Long-term aspirin at doses greater than 160mg per day                                                                                                                                                                                  | No    | 386         | 97.97 | 340       | 98.27  | 726        | 0.795   |
|                                                                                                                                                                                                                                            | Yes   | 8           | 2.03  | 6         | 1.73   | 14         |         |
| C2: Aspirin with a past history of peptic ulcer disease without concomitant PPI                                                                                                                                                            | No    | 392         | 99.49 | 344       | 99.42  | 736        | 1.000   |
|                                                                                                                                                                                                                                            | Yes   | 2           | 0.51  | 2         | 0.58   | 4          |         |
| C3: Aspirin, clopidogrel, dipyridamole, vitamin K antagonists, direct thrombin inhibitors or factor Xa inhibitors with concurrent significant bleeding risk                                                                                | No    | 389         | 98.73 | 346       | 100.00 | 735        | 0.064   |
|                                                                                                                                                                                                                                            | Yes   | 5           | 1.27  | 0         | 0.00   | 5          |         |
| C4: Aspirin plus clopidogrel as secondary stroke prevention, unless the patient has a coronary stent(s) inserted in the previous 12 months or concurrent acute coronary syndrome or has a high grade symptomatic carotid arterial stenosis | No    | 392         | 99.49 | 345       | 99.71  | 737        | 1.000   |
|                                                                                                                                                                                                                                            | Yes   | 2           | 0.51  | 1         | 0.29   | 3          |         |
| C5: Aspirin in combination with vitamin K antagonist, direct thrombin inhibitor or factor Xa inhibitors in patients with chronic atrial fibrillation                                                                                       | No    | 390         | 98.98 | 342       | 98.84  | 732        | 1.000   |
|                                                                                                                                                                                                                                            | Yes   | 4           | 1.02  | 4         | 1.16   | 8          |         |
| C6: Antiplatelet agents with vitamin K antagonist, direct thrombin inhibitor or factor Xa inhibitors in patients with stable coronary, cerebrovascular or peripheral arterial disease                                                      | No    | 393         | 99.75 | 345       | 99.71  | 738        | 1.000   |
|                                                                                                                                                                                                                                            | Yes   | 1           | 0.25  | 1         | 0.29   | 2          |         |
| C8: Vitamin K antagonist, direct thrombin inhibitor or factor Xa inhibitors for first deep venous thrombosis without continuing provoking risk factors for > 6 months                                                                      | No    | 393         | 99.75 | 345       | 99.71  | 738        | 1.000   |
|                                                                                                                                                                                                                                            | Yes   | 1           | 0.25  | 1         | 0.29   | 2          |         |
| C9: Vitamin K antagonist, direct thrombin inhibitor or factor Xa inhibitors for first pulmonary embolus without continuing provoking risk factors for > 12 months                                                                          | No    | 392         | 99.49 | 345       | 99.71  | 737        | 1.000   |
|                                                                                                                                                                                                                                            | Yes   | 2           | 0.51  | 1         | 0.29   | 3          |         |
| C10: NSAID and vitamin K antagonist, direct thrombin inhibitor or factor Xa inhibitors in combination                                                                                                                                      | No    | 390         | 98.98 | 345       | 99.71  | 735        | 0.379   |
|                                                                                                                                                                                                                                            | Yes   | 4           | 1.02  | 1         | 0.29   | 5          |         |
|                                                                                                                                                                                                                                            | No    | 389         | 98.73 | 344       | 99.42  | 733        | 0.458   |



|                                                                                                                                                                                             |     |     |        |     |        |     |       |
|---------------------------------------------------------------------------------------------------------------------------------------------------------------------------------------------|-----|-----|--------|-----|--------|-----|-------|
| D1: TriCyclic Antidepressants (TCAs) with dementia, narrow angle glaucoma, cardiac conduction abnormalities, prostatism, or prior history of urinary retention                              | Yes | 5   | 1.27   | 2   | 0.58   | 7   |       |
| D2: Initiation of TriCyclic Antidepressants (TCAs) as first-line antidepressant treatment                                                                                                   | No  | 392 | 99.49  | 345 | 99.71  | 737 | 1.000 |
|                                                                                                                                                                                             | Yes | 2   | 0.51   | 1   | 0.29   | 3   |       |
| D3: Neuroleptics with moderate-marked antimuscarinic/anticholinergic effects with a history of prostatism or previous urinary retention                                                     | No  | 394 | 100.00 | 344 | 99.42  | 738 | 0.218 |
|                                                                                                                                                                                             | Yes | 0   | 0.00   | 2   | 0.58   | 2   |       |
| D4: Selective serotonin re-uptake inhibitors (SSRI's) with current or recent significant hyponatraemia i.e. serum Na+ < 130 mmol/l                                                          | No  | 389 | 98.73  | 346 | 100.00 | 735 | 0.064 |
|                                                                                                                                                                                             | Yes | 5   | 1.27   | 0   | 0.00   | 5   |       |
| D5: Benzodiazepines for 4 or more weeks                                                                                                                                                     | No  | 251 | 63.71  | 254 | 73.41  | 505 | 0.006 |
|                                                                                                                                                                                             | Yes | 143 | 36.29  | 92  | 26.59  | 235 |       |
| D7: Anticholinergics/antimuscarinics to treat extra-pyramidal side-effects of neuroleptic medications                                                                                       | No  | 393 | 99.75  | 346 | 100.00 | 739 | 1.000 |
|                                                                                                                                                                                             | Yes | 1   | 0.25   | 0   | 0.00   | 1   |       |
| D8: Anticholinergics/antimuscarinics in patients with delirium or dementia                                                                                                                  | No  | 391 | 99.24  | 341 | 98.55  | 732 | 0.484 |
|                                                                                                                                                                                             | Yes | 3   | 0.76   | 5   | 1.45   | 8   |       |
| D9: Neuroleptic antipsychotic in patients with behavioural and psychological symptoms of dementia (BPSD) unless symptoms are severe and other non-pharmacological treatments have failed    | No  | 392 | 99.49  | 345 | 99.71  | 737 | 1.000 |
|                                                                                                                                                                                             | Yes | 2   | 0.51   | 1   | 0.29   | 3   |       |
| D10: Neuroleptics as hypnotics, unless sleep disorder is due to psychosis or dementia                                                                                                       | No  | 393 | 99.75  | 345 | 99.71  | 738 | 1.000 |
|                                                                                                                                                                                             | Yes | 1   | 0.25   | 1   | 0.29   | 2   |       |
| D11: Acetylcholinesterase inhibitors with a known history of persistent bradycardia, heart block or recurrent unexplained syncope or concurrent treatment with drugs that reduce heart rate | No  | 394 | 100.00 | 345 | 99.71  | 739 | 0.468 |
|                                                                                                                                                                                             | Yes | 0   | 0.00   | 1   | 0.29   | 1   |       |
| D14: First-generation antihistamines                                                                                                                                                        | No  | 392 | 99.49  | 345 | 99.71  | 737 | 1.000 |
|                                                                                                                                                                                             | Yes | 2   | 0.51   | 1   | 0.29   | 3   |       |
| E1: Digoxin at a long-term dose greater than 125µg/day if eGFR < 30 ml/min/1.73m2                                                                                                           | No  | 393 | 99.75  | 344 | 99.42  | 737 | 0.602 |
|                                                                                                                                                                                             | Yes | 1   | 0.25   | 2   | 0.58   | 3   |       |
| E4: NSAID's if eGFR < 50 ml/min/1.73m2                                                                                                                                                      | No  | 389 | 98.73  | 342 | 98.84  | 731 | 1.000 |
|                                                                                                                                                                                             | Yes | 5   | 1.27   | 4   | 1.16   | 9   |       |
| E6: Metformin if eGFR < 30 ml/min/1.73m2                                                                                                                                                    | No  | 388 | 98.48  | 343 | 99.13  | 731 | 0.513 |
|                                                                                                                                                                                             | Yes | 6   | 1.52   | 3   | 0.87   | 9   |       |
| F2: PPI for uncomplicated peptic ulcer disease or erosive peptic oesophagitis at full therapeutic dosage for > 8 weeks                                                                      | No  | 389 | 98.73  | 344 | 99.42  | 733 | 0.458 |
|                                                                                                                                                                                             | Yes | 5   | 1.27   | 2   | 0.58   | 7   |       |
| F3: Drugs likely to cause constipation in patients with chronic constipation where non-constipating alternatives are available                                                              | No  | 394 | 100.00 | 345 | 99.71  | 739 | 0.468 |
|                                                                                                                                                                                             | Yes | 0   | 0.00   | 1   | 0.29   | 1   |       |
| F4: Oral elemental iron doses greater than 200 mg daily                                                                                                                                     | No  | 392 | 99.49  | 346 | 100.00 | 738 | 0.501 |
|                                                                                                                                                                                             | Yes | 2   | 0.51   | 0   | 0.00   | 2   |       |
| G2: Systemic corticosteroids instead of inhaled corticosteroids for maintenance therapy in moderate-severe COPD                                                                             | No  | 394 | 100.00 | 344 | 99.42  | 738 | 0.218 |
|                                                                                                                                                                                             | Yes | 0   | 0.00   | 2   | 0.58   | 2   |       |
| G3: Anti-muscarinic bronchodilators (e.g. ipratropium, tiotropium) with a history of narrow angle glaucoma or bladder outflow obstruction                                                   | No  | 393 | 99.75  | 345 | 99.71  | 738 | 1.000 |
|                                                                                                                                                                                             | Yes | 1   | 0.25   | 1   | 0.29   | 2   |       |
| G4: Non-selective beta-blocker (whether oral or topical for glaucoma) with a history of asthma requiring treatment                                                                          | No  | 391 | 99.24  | 345 | 99.71  | 736 | 0.627 |
|                                                                                                                                                                                             | Yes | 3   | 0.76   | 1   | 0.29   | 4   |       |
| G5: Benzodiazepines with acute or chronic respiratory failure i.e. pO2 < 8.0 kPa ± pCO2 > 6.5 kPa                                                                                           | No  | 368 | 93.40  | 321 | 92.77  | 689 | 0.772 |
|                                                                                                                                                                                             | Yes | 26  | 6.60   | 25  | 7.23   | 51  |       |
| H2: NSAID with severe hypertension or severe heart failure                                                                                                                                  | No  | 390 | 98.98  | 345 | 99.71  | 735 | 0.379 |
|                                                                                                                                                                                             | Yes | 4   | 1.02   | 1   | 0.29   | 5   |       |
| H3: Long-term use of NSAID (>3 months) for symptom relief of osteoarthritis pain where paracetamol has not been tried                                                                       | No  | 393 | 99.75  | 346 | 100.00 | 739 | 1.000 |
|                                                                                                                                                                                             | Yes | 1   | 0.25   | 0   | 0.00   | 1   |       |
| H5: Corticosteroids (other than periodic intra-articular injections for mono-articular pain) for osteoarthritis                                                                             | No  | 393 | 99.75  | 346 | 100.00 | 739 | 1.000 |
|                                                                                                                                                                                             | Yes | 1   | 0.25   | 0   | 0.00   | 1   |       |
| H7: COX-2 selective NSAIDs with concurrent cardiovascular disease                                                                                                                           | No  | 393 | 99.75  | 346 | 100.00 | 739 | 1.000 |
|                                                                                                                                                                                             | Yes | 1   | 0.25   | 0   | 0.00   | 1   |       |
| I1: Antimuscarinic drugs with dementia, or chronic cognitive impairment or narrow-angle glaucoma, or chronic prostatism                                                                     | No  | 389 | 98.73  | 339 | 97.98  | 728 | 0.562 |
|                                                                                                                                                                                             | Yes | 5   | 1.27   | 7   | 2.02   | 12  |       |
| I2: Selective alpha-1 selective alpha blockers in those with symptomatic orthostatic hypotension or micturition syncope                                                                     | No  | 394 | 100.00 | 345 | 99.71  | 739 | 0.468 |
|                                                                                                                                                                                             | Yes | 0   | 0.00   | 1   | 0.29   | 1   |       |
| J1: Sulphonylureas with a long duration of action (e.g. glibenclamide, chlorpropamide, glimepiride) with type 2 diabetes mellitus                                                           | No  | 392 | 99.49  | 344 | 99.42  | 736 | 1.000 |
|                                                                                                                                                                                             | Yes | 2   | 0.51   | 2   | 0.58   | 4   |       |
| J3: Beta-blockers in diabetes mellitus with frequent hypoglycaemic episodes                                                                                                                 | No  | 391 | 99.24  | 346 | 100.00 | 737 | 0.252 |
|                                                                                                                                                                                             | Yes | 3   | 0.76   | 0   | 0.00   | 3   |       |
| K1: Benzodiazepines                                                                                                                                                                         | No  | 319 | 80.96  | 297 | 85.84  | 616 | 0.093 |
|                                                                                                                                                                                             | Yes | 75  | 19.04  | 49  | 14.16  | 124 |       |
| K2: Neuroleptic drugs                                                                                                                                                                       | No  | 374 | 94.92  | 336 | 97.11  | 710 | 0.140 |
|                                                                                                                                                                                             | Yes | 20  | 5.08   | 10  | 2.89   | 30  |       |
|                                                                                                                                                                                             | No  | 392 | 99.49  | 343 | 99.13  | 735 | 0.669 |

|                                                                                                                          |     |     |       |     |        |     |       |
|--------------------------------------------------------------------------------------------------------------------------|-----|-----|-------|-----|--------|-----|-------|
| K3: Vasodilator drugs with persistent postural hypotension i.e. recurrent drop in systolic blood pressure $\geq 20$ mmHg | Yes | 2   | 0.51  | 3   | 0.87   | 5   |       |
| K4: Hypnotic Z-drugs e.g. zopiclone, zolpidem, zaleplon                                                                  | No  | 388 | 98.48 | 341 | 98.55  | 729 | 1.000 |
|                                                                                                                          | Yes | 6   | 1.52  | 5   | 1.45   | 11  |       |
| L1: Use of oral or transdermal strong opioids as first line therapy for mild pain                                        | No  | 381 | 96.70 | 343 | 99.13  | 724 | 0.024 |
|                                                                                                                          | Yes | 13  | 3.30  | 3   | 0.87   | 16  |       |
| L2: Use of regular (as distinct from PRN) opioids without concomitant laxative                                           | No  | 371 | 94.16 | 331 | 95.66  | 702 | 0.406 |
|                                                                                                                          | Yes | 23  | 5.84  | 15  | 4.34   | 38  |       |
| L3: Long-acting opioids without short-acting opioids for break-through pain                                              | No  | 391 | 99.24 | 346 | 100.00 | 737 | 0.252 |
|                                                                                                                          | Yes | 3   | 0.76  | 0   | 0.00   | 3   |       |
| N1: Concomitant use of two or more drugs with antimuscarinic/anticholinergic properties                                  | No  | 393 | 99.75 | 346 | 100.00 | 739 | 1.000 |
|                                                                                                                          | Yes | 1   | 0.25  | 0   | 0.00   | 1   |       |

**Table S6.** Potential prescribing omissions according to START criteria by sex. Fisher's Exact Test.

| Variable                                                                                                                                                                                                                                                                                                                                | Level | Female |        | Male |        | Total | P-value |
|-----------------------------------------------------------------------------------------------------------------------------------------------------------------------------------------------------------------------------------------------------------------------------------------------------------------------------------------|-------|--------|--------|------|--------|-------|---------|
|                                                                                                                                                                                                                                                                                                                                         |       | N      | %      | N    | %      | N     |         |
| A1: Vitamin K antagonists or direct thrombin / factor Xa inhibitors in the presence of chronic atrial fibrillation                                                                                                                                                                                                                      | No    | 383    | 97.21  | 337  | 97.40  | 720   | 1.000   |
|                                                                                                                                                                                                                                                                                                                                         | Yes   | 11     | 2.79   | 9    | 2.60   | 20    |         |
| A2: Aspirin in the presence of chronic atrial fibrillation, where Vitamin K antagonists or direct thrombin / factor Xa inhibitors are contraindicated                                                                                                                                                                                   | No    | 393    | 99.75  | 345  | 99.71  | 738   | 1.000   |
|                                                                                                                                                                                                                                                                                                                                         | Yes   | 1      | 0.25   | 1    | 0.29   | 2     |         |
| A3: Antiplatelet therapy with a documented history of coronary, cerebral or peripheral vascular disease                                                                                                                                                                                                                                 | No    | 391    | 99.24  | 340  | 98.27  | 731   | 0.317   |
|                                                                                                                                                                                                                                                                                                                                         | Yes   | 3      | 0.76   | 6    | 1.73   | 9     |         |
| A4: Antihypertensive therapy where systolic blood pressure consistently > 160 mmHg and/or diastolic blood pressure consistently >90 mmHg; if systolic blood pressure > 140 mmHg and /or diastolic blood pressure > 90 mmHg, if diabetic                                                                                                 | No    | 391    | 99.24  | 340  | 98.27  | 731   | 0.317   |
|                                                                                                                                                                                                                                                                                                                                         | Yes   | 3      | 0.76   | 6    | 1.73   | 9     |         |
| A5: Statin therapy with a documented history of coronary, cerebral or peripheral vascular disease, unless the patient's status is end-of-life or age is > 85 years                                                                                                                                                                      | No    | 393    | 99.75  | 344  | 99.42  | 737   | 0.602   |
|                                                                                                                                                                                                                                                                                                                                         | Yes   | 1      | 0.25   | 2    | 0.58   | 3     |         |
| A6: ACE inhibitor with systolic heart failure and/or documented coronary artery disease                                                                                                                                                                                                                                                 | No    | 372    | 94.42  | 330  | 95.38  | 702   | 0.618   |
|                                                                                                                                                                                                                                                                                                                                         | Yes   | 22     | 5.58   | 16   | 4.62   | 38    |         |
| A7: Beta-blocker with ischaemic heart disease                                                                                                                                                                                                                                                                                           | No    | 387    | 98.22  | 339  | 97.98  | 726   | 1.000   |
|                                                                                                                                                                                                                                                                                                                                         | Yes   | 7      | 1.78   | 7    | 2.02   | 14    |         |
| A8: Appropriate beta-blocker (bisoprolol, nebivolol, metoprolol or carvedilol) with stable systolic heart failure                                                                                                                                                                                                                       | No    | 369    | 93.65  | 332  | 95.95  | 701   | 0.188   |
|                                                                                                                                                                                                                                                                                                                                         | Yes   | 25     | 6.35   | 14   | 4.05   | 39    |         |
| B1: Regular inhaled b2 agonist or antimuscarinic bronchodilator (e.g. ipratropium, tiotropium) for mild to moderate asthma or COPD                                                                                                                                                                                                      | No    | 394    | 100.00 | 344  | 99.42  | 738   | 0.218   |
|                                                                                                                                                                                                                                                                                                                                         | Yes   | 0      | 0.00   | 2    | 0.58   | 2     |         |
| B2: Regular inhaled corticosteroid for moderate-severe asthma or COPD, where FEV1 <50% of predicted value and repeated exacerbations requiring treatment with oral corticosteroids                                                                                                                                                      | No    | 392    | 99.49  | 345  | 99.71  | 737   | 1.000   |
|                                                                                                                                                                                                                                                                                                                                         | Yes   | 2      | 0.51   | 1    | 0.29   | 3     |         |
| C2: Non-TCA antidepressant drug in the presence of persistent major depressive symptoms                                                                                                                                                                                                                                                 | No    | 387    | 98.22  | 339  | 97.98  | 726   | 1.000   |
|                                                                                                                                                                                                                                                                                                                                         | Yes   | 7      | 1.78   | 7    | 2.02   | 14    |         |
| C3: Acetylcholinesterase inhibitor (e.g. donepezil, rivastigmine, galantamine) for mild-moderate Alzheimer's dementia or Lewy Body dementia (rivastigmine)                                                                                                                                                                              | No    | 391    | 99.24  | 340  | 98.27  | 731   | 0.317   |
|                                                                                                                                                                                                                                                                                                                                         | Yes   | 3      | 0.76   | 6    | 1.73   | 9     |         |
| C5: Selective serotonin reuptake inhibitor (or SNRI or pregabalin if SSRI contraindicated) for persistent severe anxiety that interferes with independent functioning                                                                                                                                                                   | No    | 392    | 99.49  | 346  | 100.00 | 738   | 0.501   |
|                                                                                                                                                                                                                                                                                                                                         | Yes   | 2      | 0.51   | 0    | 0.00   | 2     |         |
| D1: Proton Pump Inhibitor with severe gastro-oesophageal reflux disease or peptic stricture requiring dilatation                                                                                                                                                                                                                        | No    | 392    | 99.49  | 342  | 98.84  | 734   | 0.426   |
|                                                                                                                                                                                                                                                                                                                                         | Yes   | 2      | 0.51   | 4    | 1.16   | 6     |         |
| D2: Fibre supplements (e.g. bran, ispaghula, methylcellulose, sterculia) for diverticulosis with a history of constipation                                                                                                                                                                                                              | No    | 393    | 99.75  | 345  | 99.71  | 738   | 1.000   |
|                                                                                                                                                                                                                                                                                                                                         | Yes   | 1      | 0.25   | 1    | 0.29   | 2     |         |
| E1: Disease-modifying anti-rheumatic drug (DMARD) with active, disabling rheumatoid disease                                                                                                                                                                                                                                             | No    | 394    | 100.00 | 345  | 99.71  | 739   | 0.468   |
|                                                                                                                                                                                                                                                                                                                                         | Yes   | 0      | 0.00   | 1    | 0.29   | 1     |         |
| E2: Bisphosphonates and vitamin D and calcium in patients taking long-term systemic corticosteroid therapy                                                                                                                                                                                                                              | No    | 387    | 98.22  | 343  | 99.13  | 730   | 0.351   |
|                                                                                                                                                                                                                                                                                                                                         | Yes   | 7      | 1.78   | 3    | 0.87   | 10    |         |
| E3: Vitamin D and calcium supplement in patients with known osteoporosis and/or previous fragility fracture(s)                                                                                                                                                                                                                          | No    | 379    | 96.19  | 340  | 98.27  | 719   | 0.120   |
|                                                                                                                                                                                                                                                                                                                                         | Yes   | 15     | 3.81   | 6    | 1.73   | 21    |         |
| E4: Bone anti-resorptive or anabolic therapy (e.g. bisphosphonate, strontium ranelate, teriparatide, denosumab) in patients with documented osteoporosis, where no pharmacological or clinical status contraindication exists (Bone Mineral Density T-scores > 2.5 in multiple sites) and/or previous history of fragility fracture(s). | No    | 390    | 98.98  | 343  | 99.13  | 733   | 1.000   |
|                                                                                                                                                                                                                                                                                                                                         | Yes   | 4      | 1.02   | 3    | 0.87   | 7     |         |
| E5: Vitamin D supplement in older people who are housebound or experiencing falls or with osteopenia                                                                                                                                                                                                                                    | No    | 357    | 90.61  | 307  | 88.73  | 664   | 0.467   |
|                                                                                                                                                                                                                                                                                                                                         | Yes   | 37     | 9.39   | 39   | 11.27  | 76    |         |
| E6: Xanthine-oxidase inhibitors (e.g. allopurinol, febuxostat) with a history of recurrent episodes of gout                                                                                                                                                                                                                             | No    | 393    | 99.75  | 344  | 99.42  | 737   | 0.602   |
|                                                                                                                                                                                                                                                                                                                                         | Yes   | 1      | 0.25   | 2    | 0.58   | 3     |         |
| E7: Folic acid supplement in patients taking methotexate                                                                                                                                                                                                                                                                                | No    | 394    | 100.00 | 345  | 99.71  | 739   | 0.468   |
|                                                                                                                                                                                                                                                                                                                                         | Yes   | 0      | 0.00   | 1    | 0.29   | 1     |         |
| F1: ACE inhibitor or Angiotensin Receptor Blocker (if intolerant of ACE inhibitor) in diabetes with evidence of renal disease i.e. dipstick proteinuria or microalbuminuria (>30mg/24 hours) with or without serum biochemical renal impairment.                                                                                        | No    | 393    | 99.75  | 343  | 99.13  | 736   | 0.345   |
|                                                                                                                                                                                                                                                                                                                                         | Yes   | 1      | 0.25   | 3    | 0.87   | 4     |         |
| G1: Alpha-1 receptor blocker with symptomatic prostatism, where prostatectomy is not considered necessary                                                                                                                                                                                                                               | No    | 394    | 100.00 | 344  | 99.42  | 738   | 0.218   |
|                                                                                                                                                                                                                                                                                                                                         | Yes   | 0      | 0.00   | 2    | 0.58   | 2     |         |
| G2: 5-alpha reductase inhibitor with symptomatic prostatism, where prostatectomy is not considered necessary                                                                                                                                                                                                                            | No    | 394    | 100.00 | 342  | 98.84  | 736   | 0.047   |
|                                                                                                                                                                                                                                                                                                                                         | Yes   | 0      | 0.00   | 4    | 1.16   | 4     |         |
| H1: High-potency opioids in moderate-severe pain, where paracetamol, NSAIDs or low-potency opioids are not appropriate to the pain severity or have been ineffective                                                                                                                                                                    | No    | 393    | 99.75  | 345  | 99.71  | 738   | 1.000   |
|                                                                                                                                                                                                                                                                                                                                         | Yes   | 1      | 0.25   | 1    | 0.29   | 2     |         |
| H2: Laxatives in patients receiving opioids regularly                                                                                                                                                                                                                                                                                   | No    | 358    | 90.86  | 332  | 95.95  | 690   | 0.008   |
|                                                                                                                                                                                                                                                                                                                                         | Yes   | 36     | 9.14   | 14   | 4.05   | 50    |         |
